# Supplementary material
Source: Research Square preprint supplement (doi:10.21203/rs.3.rs-9051310/v1)
Supplement: Supplementary file 1 [file 0331468c9e7ae7a3b59a4561.docx]

**Additional file 5 Table. Post-intervention community survey on healthcare access and malaria management in the intervention zone**

| Village | Household | Registered Population | Travel history of household members beyond the intervention zone | Inflow of individuals from outside the MDA zone into study households | Test of RDT (%) | AP treated (%) | Total number of visitors (%) |
| --- | --- | --- | --- | --- | --- | --- | --- |
| Matchatom | 145 | 841 | 21 | 50 | 1 (2.0) | 13 (26.0) | 71 (8.4) |
| Kolidè | 173 | 733 | 24 | 38 | 1 (2.6) | 18 (47.4) | 62 (8.5) |
| Igbomédji | 183 | 902 | 83 | 38 | 0 (0) | 10 (26.3) | 121 (13.4) |
| Total | 501 | 2,476 | 128 | 126 | 2 (1.6) | 41 (32.5) | 254 (10.3) |

*AP: artemisinin-piperaquine; MDA: mass drug administration; RDT: rapid diagnostic tests.
