# Supplementary material
Source: Research Square preprint supplement (doi:10.21203/rs.3.rs-9051310/v1)
Supplement: Supplementary file 2 [file 37912df016e3e9142f758e14.docx]

**Additional file 1 Table. Population not administered AP during MDA in the intervention zone (Est-Mono)**

| MDA | Registered population | Infants ＜ 6 months (‰) | Pregnant Women ≤ 3 months (‰) | Severe cases (‰) | Allergic (‰) | Trip (‰) | Absent (‰) | Refuse (‰) | Total (‰) |
| --- | --- | --- | --- | --- | --- | --- | --- | --- | --- |
| Round 1 | 150,707 | 2,647  (17.6) | 566  (3.8) | 37  (0.2) | 6  (0.0) | 4,608  (30.6) | 1,040  (6.9) | 116  (0.8) | 9,020  (59.9) |
| Round 2 | 155,713 | 2,733  (17.6) | 698  (4.5) | 97  (0.6) | 56  (0.4) | 4,650  (29.9) | 1,220  (7.8) | 167  (1.1) | 9,621  (61.8) |
| Round 3 | 159,631 | 2,835  (17.8) | 886  (5.6) | 94  (0.6) | 93  (0.6) | 1,731  (10.8) | 263  (1.6) | 16  (0.1) | 5,918  (37.1) |

*AP: artemisinin-piperaquine; MDA: mass drug administration.
