# Supplementary material
Source: Research Square preprint supplement (doi:10.21203/rs.3.rs-9051310/v1)
Supplement: Supplementary file 3 [file 818d74b42da6fdcd9112ead3.docx]

**Additional file 4 Table. Healthcare-seeking behavior and case management for febrile illnesses in surveyed villages of the intervention zone**

| Village | Householda | Families with fever cases (%)b | Families with malaria cases (%)c | Families seeking medical help upon the onset of malaria (%)d | Self-medication family (%)e |
| --- | --- | --- | --- | --- | --- |
| Matchatom | 145 | 54(37.2) | 25(17.2) | 21(38.9) | 22(40.7) |
| Kolidè | 173 | 42(24.3) | 21(12.1) | 28(66.7) | 12(28.6) |
| Igbomédji | 183 | 57(31.1) | 24(13.1) | 37(64.9) | 7(12.3) |
| Total | 501 | 153(30.5) | 70(14.0) | 86(56.2) | 41(26.8) |

Note: b=b/a, c=c/a, d=d/b, e=e/b
