# Supplementary material
Source: Research Square preprint supplement (doi:10.21203/rs.3.rs-9051310/v1)
Supplement: Supplementary file 4 [file 9278a8eb00b0c54acd50525d.docx]

**Additional file 2 Table. Malaria cases recorded at health facilities between Est-Mono and Anié, 2016–2018**

| Region | Year | Cases | Jan | Feb | Mar | Apr | May | Jun | Jul | Aug | Sep | Oct | Nov | Dec | Total |
| --- | --- | --- | --- | --- | --- | --- | --- | --- | --- | --- | --- | --- | --- | --- | --- |
| Est-Mono  (Intervention) | 2016 | Outpatient | 2,286 | 1,948 | 1,257 | 1,573 | 3,191 | 3,807 | 5,565 | 5,288 | 4,939 | 4,963 | 5,671 | 3,481 | 43,969 |
| Hospitalization | 68 | 47 | 28 | 46 | 82 | 98 | 147 | 208 | 192 | 169 | 182 | 112 | 1,379 |
| Death | 0 | 0 | 2 | 0 | 1 | 3 | 4 | 4 | 3 | 2 | 5 | 3 | 27 |
| 2017 | Outpatient | 2,768 | 2,432 | 1,527 | 234 | 283 | 560 | 1,559 | 2,940 | 3,573 | 5,000 | 4,386 | 2,717 | 27,979 |
| Hospitalization | 38 | 27 | 9 | 5 | 22 | 36 | 84 | 84 | 114 | 222 | 164 | 85 | 890 |
| Death | 1 | 1 | 2 | 0 | 1 | 2 | 4 | 1 | 3 | 10 | 4 | 2 | 29 |
| 2018 | Outpatient | 2,304 | 2,231 | 1,938 | 2,831 | 3,702 | 4,744 | 5,072 | 4,756 | 4,311 | 4,677 | 4,296 | 3,099 | 43,961 |
| Hospitalization | 80 | 70 | 40 | 64 | 132 | 147 | 118 | 104 | 149 | 110 | 153 | 89 | 1,256 |
| Death | 2 | 2 | 1 | 0 | 1 | 3 | 2 | 1 | 4 | 4 | 6 | 1 | 27 |
| Anié  (Control) | 2016 | Outpatient | 1,193 | 918 | 774 | 979 | 1,779 | 1,863 | 2,531 | 2,840 | 2,221 | 2,061 | 2,545 | 1,497 | 21,201 |
| Hospitalization | 20 | 6 | 8 | 8 | 18 | 13 | 22 | 27 | 8 | 21 | 7 | 4 | 162 |
| Death | 0 | 0 | 0 | 0 | 0 | 1 | 0 | 0 | 0 | 0 | 0 | 0 | 1 |
| 2017 | Outpatient | 1,089 | 1,021 | 750 | 686 | 1,426 | 2,499 | 2,351 | 2,118 | 2,154 | 2,466 | 2,132 | 1,289 | 19,981 |
| Hospitalization | 15 | 16 | 18 | 5 | 23 | 46 | 62 | 57 | 50 | 31 | 30 | 15 | 368 |
| Death | 0 | 0 | 0 | 0 | 0 | 0 | 0 | 1 | 1 | 1 | 0 | 0 | 3 |
| 2018 | Outpatient | 1,167 | 1,087 | 771 | 1,120 | 1,967 | 2,113 | 2,479 | 2,662 | 2,565 | 2,676 | 2,969 | 1,847 | 23,423 |
| Hospitalization | 28 | 19 | 19 | 21 | 24 | 24 | 19 | 33 | 33 | 16 | 33 | 20 | 289 |
| Death | 0 | 0 | 0 | 0 | 1 | 2 | 1 | 2 | 1 | 1 | 1 | 0 | 9 |
