# Supplementary material
Source: Research Square preprint supplement (doi:10.21203/rs.3.rs-9051310/v1)
Supplement: Supplementary file 5 [file c0321f768842e13edf8c5533.docx]

**Additional file 3 Table. Community retrospective AP MDA coverage survey**

| Village | Household | Registered Population | Round 1 | Round 2 | Round 3 |
| --- | --- | --- | --- | --- | --- |
| Number  Treated (%) | Number  Treated (%) | Number  Treated (%) |
| Matchatom | 145 | 841 | 787(94) | 821(98) | 823(98) |
| Kolidè | 173 | 733 | 689(94) | 711(97) | 707(96) |
| Igbomédji | 183 | 902 | 824(91) | 828(92) | 843(93) |
| Total | 501 | 2,476 | 2,300(93) | 2,360(95) | 2,373(96) |

*AP: artemisinin-piperaquine; MDA: mass drug administration.
